# Supplementary material
Source: PubMed Central journal article supplement (PMC4652054)
Supplement: JB.00521-15_zjb999093832so1.pdf [file JB.00521-15_zjb999093832so1.pdf]

## Supplementary Data

### Identification and biochemical characterization of a novel $\alpha$ 2,3-sialyltransferase WbwA from pathogenic *Escherichia coli* serotype O104

Diana Czuchry, Paul Desormeaux, Melissa Stuart, Donald L. Jarvis, Khushi L. Matta, Walter A. Szarek, and Inka Brockhausen

**Supplementary Figure 1.** Sequence comparisons of WbwA<sup>O104</sup> and sites of mutations. Alignments of sialyltransferases were done using ClustalW2 (35) and were adjusted slightly so that the HP motifs were aligned. The alignments were edited using GeneDoc (36, <http://www.psc.edu/biomed/genedoc>). WbwA was from *E. coli* O104, NST from *Neisseria meningitidis*, WaaH from *Salmonella enterica*, PM0188 from *Pasteurella multocida* and ST3Gal-I was human. HP mutation sites for WbwA are shown in light blue, whereas the HP motifs in other sequences are shown in dark blue. The ED mutations for WbwA are shown in coral red, whereas the E(D)E(D)G motifs in other sequences are shown in pink. ST3Gal1 has an HP sequence but does not have an E(D)E(D)G motif.

```

0          *          20          *          40          *          60          *          80          *          100
WbwA      : -----MKMRNNVFEVDSPYCLLIYCILENHQLH-----DTIYIYSDNVSLRDINEFG----- : 47
NST       : MFNLSEWSFRDMGLKKAQCLTVLCLIVFCFGIFYTFDRVNGGERNAVSLKDKLPNEEGEPVNLIFCYTIILQMKVAERIMAOEEGERFYVVLMSENRNEKYDYFNQIKD : 109
WaaH      : -----MFLFCMTNLQLLIARSIIEKEQLKSVLDLFIGDVHNVKNQYYLKKIQP----- : 49
PM0188    : MKNRRLNFKLFLLIIFSLFSTLWSKTTITLYLDPASLPALNQLMDFEQNNEDKTHPRIFGLSRFKIPDNIIITQYQNIHFVELKDNRPTEALPTILDQYPGNIELDIHLN : 109
ST3GalI   : -----MVTLRKRTLKVLTLFLVLFIFLTSFFLNYSHMTVATTWFPKQMVLELSENLRRL : 53

          *          120          *          140          *          160          *          180          *          200          *
WbwA      : -KERYIIKKGNNKTSKIFYFYFCFLFRL-IINPKLRKLSNRKDYRFLGQDHLFFSKPFLNEFILLEDGLANYRYPH-----YSRLYKLIIGGHTFGRSTKVN : 142
NST       : KAERAYFFHLPYGLNKSFNFIPTMAELKVKAMLLPKVKRIYLASLEKVSIAAFLSTYDPAEIKTFDDG-----TGN-----LIQSSSYLGDEFVNGTIKRNE : 202
WaaH      : LCRHSSIVSQVSKFAAFKTIHRTRYAKKIMESYAKEVHTVFFANFHVPLIHILSCISFSEINTFDDG-----TNN-----INQKS--IMYENKNISSTSKL : 139
PM0188    : IAHSVQLIRPILAYRPFKHLDRVSIQRLNLYDDGSMEYVDLEKEENKDISAEIKQAEKQLSHYLLTGKIKFDNPTIARYVWQSAF PVKYHFLSTDYFEKAEFLQPLKEYL : 218
ST3GalI   : IKHRPCTCTHCIGQRKLSAWFDERFNQTMQPLLAQNALLEDITYRWWRLRQREKKPNLNNDTIKELFRVVPGNVDPMLLEKRSVGCRCRAVVGNSGNLRESSYGPPEIDS : 162

          220          *          240          *          260          *          280          *          300          *          320
WbwA      : KILLSGMIDIIDPTINDKVEFFDLIAAEKLNVSQKKEINHIHFNICYIEDELVADVMILTQPLSEDGFISENEKIRLYDEIIEKEYDDKKIVIRQEERELTDYSLYFKDVK : 251
NST       : ARMMIGDWSIAKTRNASDEHYTIFKGLKNIMDDGRRKMTYLPPLDASELKAGDETTGGTVRILLGSPDKEMKEISEKAAKNFNIQYVAP-----EE-----RQTYGLSG : 300
WaaH      : IRKLMGRKYHKDEILKLDADYTLFNNRTNIEKTEGIIILVHHNGLPDTNNGFKKVLGTVYTDALKNKEDCCVFLQHLQRFIKKKAVDIYIEEPRYDSSHQFNGLNVN : 248
PM0188    : AENYQKMDWTAYQQLTPEQQAFTLTVGFNDEVKQSLVQQAQKIFFTGTTTWEGNTDVREYYAQQLNLLNHFTQAGGDLFIGDHYKIYFKG-EERGGEINDYILNNAK : 326
ST3GalI   : HDFVLRMNKAPTAGFEADVGTKTHHLVYPESEFRELGDNVSMILVPEKTIDLEWVVSAITTGTISHTYI PVPAKIRVKQDKILIIY-----EEAFIKYVFDNWLQGH : 263

          *          340          *          360          *          380          *          400          *
WbwA      : VNKVKAPVELVVLNSP--MIKTAVTLFSGGIFNIPCREKIFKGTSPSPLLSKHFGNINSKPEVKGKK----- : 316
NST       : VPTLNSPYVIEDYILREIKKNPHTRYEITYFFSGAALTMKDFPNVHVYALKPASLPEDYWLKPVYALFTQSGIPILTFDDKD----- : 382
WaaH      : SEMIAEDIIILEYLEQG--MSLEIYGFNSTVQYNLNNISTIKNYKITSF-FLKDSFNHGLGDFNQVSV----- : 313
PM0188    : NITNIPANISFEVLMMTGLLPDKVGGVASSLYFSLPKKISHIIFTSNKQVKSKEDALNMPYVKMRRRLGIIDESQVIFWDSLKQL- : 412
ST3GalI   : GRYPSTGILSVIFSMHVCDEVLDLYGFGADSKGNWHYEWENNPASAGAFRKTGVHDADEFENVTATLASINKIRIFKGR----- : 340

```

**Supplementary Figure 2**

Western blot of wild type and mutant WbwA. Lysates of bacteria containing wild type WbwA (WT) and six WbwA mutants were run on SDS-PAGE and visualized on a Western blot after treatment with mouse anti-His antibody, goat anti-mouse antibody linked to horseradish peroxidase, and Lightning Plus ECL Chemiluminescence Substrate. All proteins show only one band at about 38 kDa in mass.

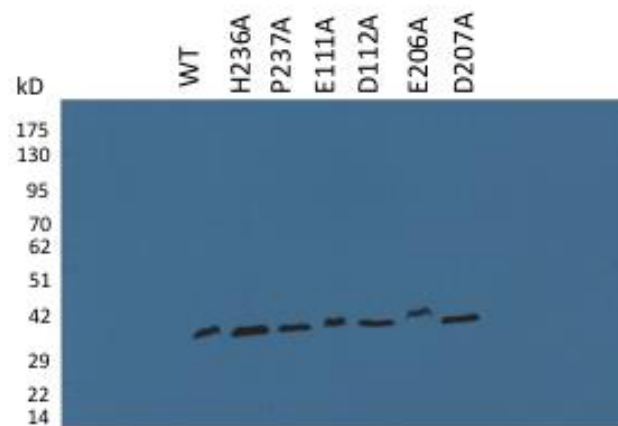

**Supplementary Figure 3A.** Kinetics of WbwA<sup>O104</sup> using acceptor Gal $\beta$ 1-3GalNAc $\alpha$ -PP-PhU and bacterial lysate. Assays for SiaT WbwA were carried out as described in the Methods section. **The CMP-Sia concentration in the assays was 0.8 mM.** The apparent  $K_M$  for the acceptor Gal $\beta$ 1-3GalNAc $\alpha$ -PP-PhU was 0.02 mM and the apparent  $V_{max}$  was 50 nmol/h/mg.

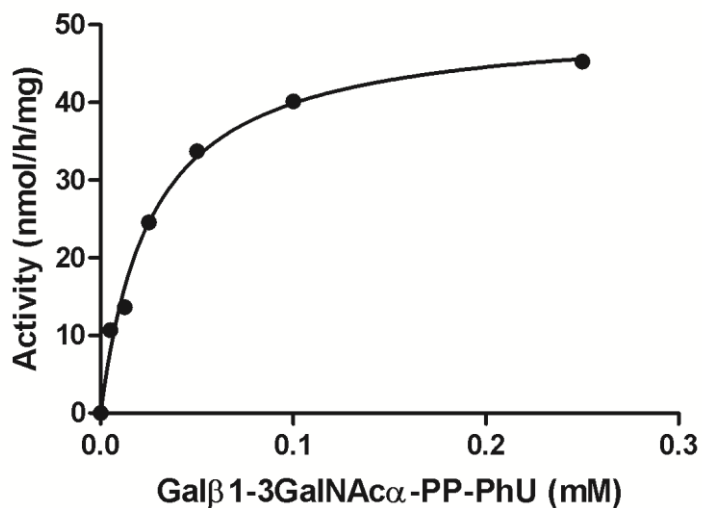

**Supplementary Figure 3B.** Kinetics for CMP-sialic acid of WbwA<sup>O104</sup> using acceptor Gal $\beta$ 1-3GalNAc $\alpha$ -PP-PhU and bacterial lysate. Assays for SiaT WbwA were carried out as described in the Methods section. **The acceptor concentration in the assays was 0.1 mM.** The apparent  $K_M$  value for CMP-sialic acid (CMP-SA) was 0.013 mM and the apparent  $V_{max}$  was 90 nmol/h/mg.

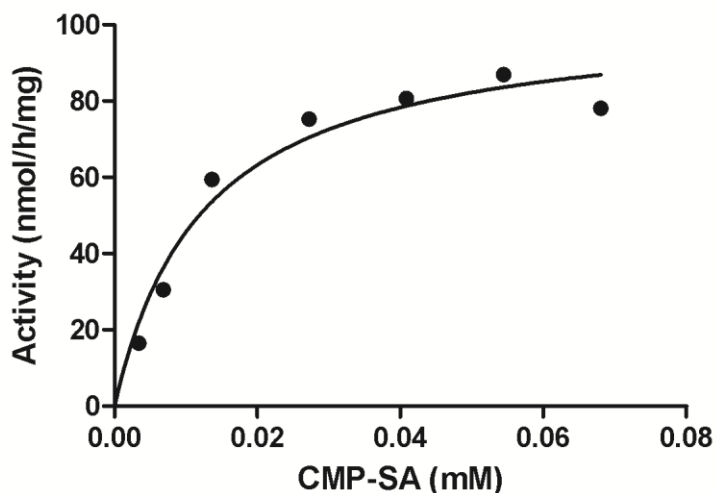

**Supplementary Figure 4.** Metal ion dependence of WbWA<sup>O104</sup> activities.

Sialyltransferase assays were carried out using CMP-sialic acid donor and Gal $\beta$ 1-3GalNAc-PP-PhU acceptor as described in the Methods section. Metal ions were added at 5 mM concentration to the assays. Assays with EDTA at 5 mM and no addition (None) served as negative controls. CoAc, Cobalt acetate. No metal ions were required but Mn<sup>2+</sup> showed a slight stimulation of activity.

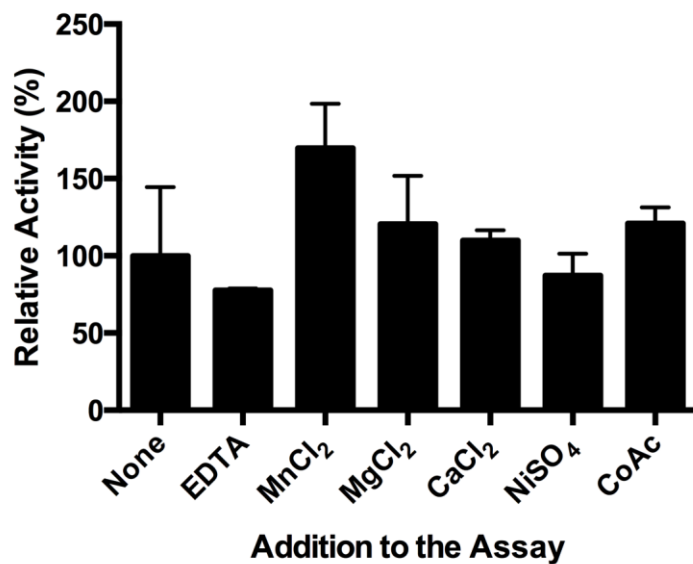

**Supplementary Figure 5.** WbwA<sup>O104</sup> activity at different buffer pH values. Sialyltransferase activity of WbwA<sup>O104</sup> was assayed as described in the Methods section at different buffer pH values.

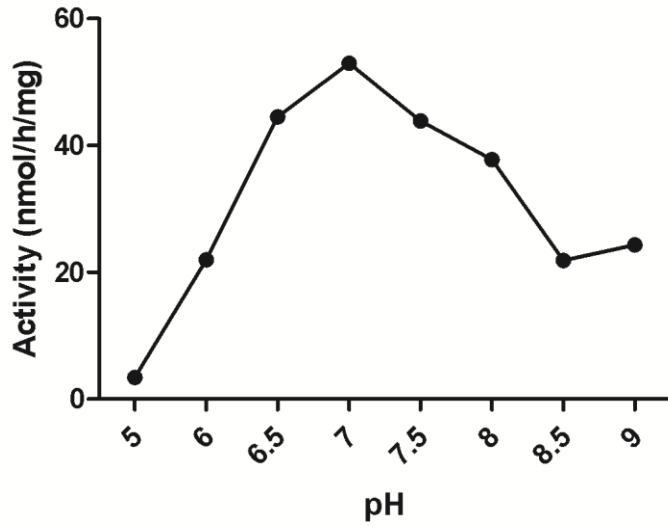

**Supplementary Figure 6A.** 600 MHz TOCSY NMR spectrum of WbWA<sup>O104</sup> product Sialyl $\alpha$ 2-3Gal $\beta$ 1-3GalNAc $\alpha$ -PO<sub>3</sub>-PO<sub>3</sub>-(CH<sub>2</sub>)<sub>11</sub>-O-Phenyl.

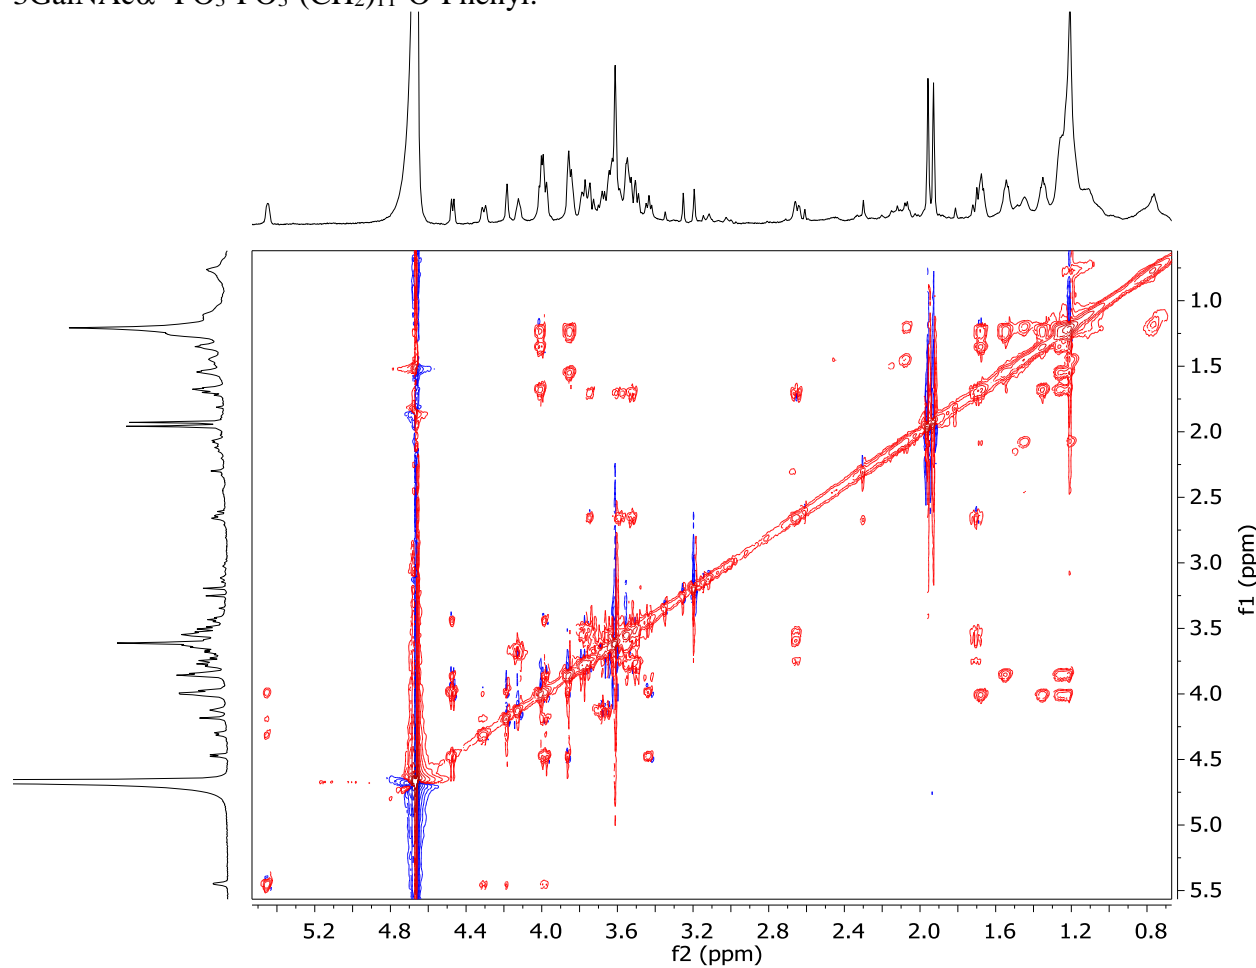

**Supplementary Figure 6B.** 600 MHz HSQC NMR spectrum of WbwA<sup>O104</sup> product Sialyl $\alpha$ 2-3Gal $\beta$ 1-3GalNAc $\alpha$ -PO<sub>3</sub>-PO<sub>3</sub>-(CH<sub>2</sub>)<sub>11</sub>-O-Phenyl.

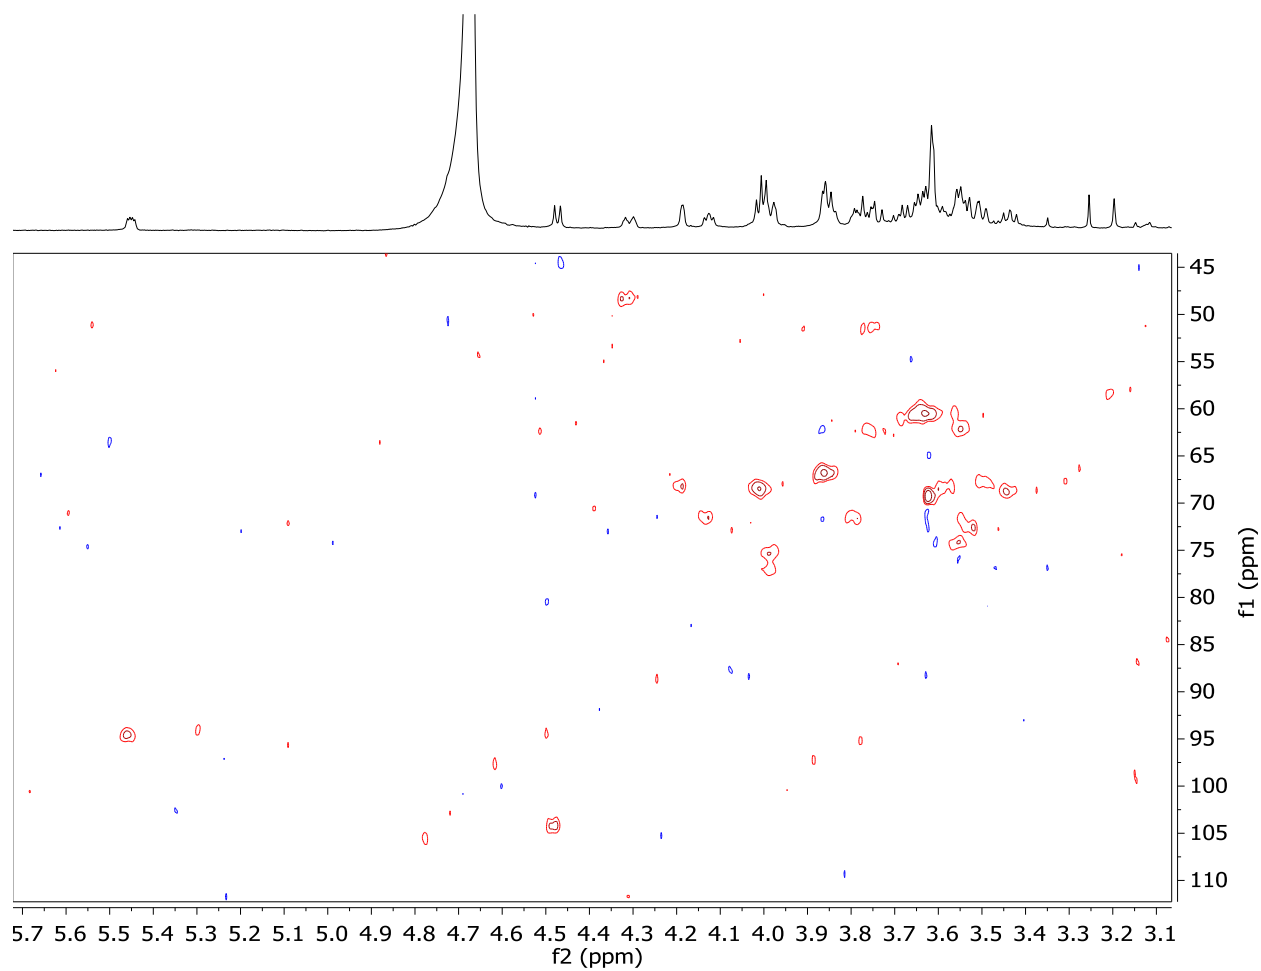

**Supplementary TABLE I.** Glycosyltransferases potentially related to WbwA

| <b>Enzyme</b>                                                          | <b>GT family</b> | <b>UniProt #</b> | <b>%Identity</b> |
|------------------------------------------------------------------------|------------------|------------------|------------------|
| $\beta$ 3-Gal-transferase, WbwC ( <i>E. coli</i> O104)                 | 2                | Q93NP5           | 11.8             |
| $\alpha$ 4-Gal-transferase, WbwB, putative ( <i>E. coli</i> O104)      | 4                | Q93NP7           | 14.7             |
| $\alpha$ 3-SiaT, ST3Gal1, human                                        | 29               | Q11201           | 13.6             |
| $\alpha$ 3-SiaT, CstI ( <i>Campylobacter jejuni</i> )                  | 42               | D2KQ02           | 13.1             |
| $\alpha$ 3/8-SiaT, bifunctional, CstII ( <i>Campylobacter jejuni</i> ) | 42               | Q9L9Q5           | 12.7             |
| <b><math>\alpha</math>3-SiaT, WbwA (<i>E. coli</i> O104)</b>           | <b>52</b>        | <b>Q93NP9</b>    | <b>100</b>       |
| $\alpha$ 3/6-SiaT, NST bifunctional ( <i>Neisseria meningitidis</i> )  | 52               | C6S6J1           | 12.4             |
| $\alpha$ 3-SiaT, ( <i>Neisseria gonorrhoea</i> )                       | 52               | P72074           | 14.2             |
| $\alpha$ 3-SiaT ( <i>Neisseria meningitidis</i> )                      | 52               | P72097           | 13.0             |
| $\alpha$ 3-SiaT, Lst, PMST2 ( <i>Pasteurella multocida</i> )           | 52               | Q9CNC4           | 14.3             |
| $\alpha$ 2-Glc-transferase, WaaH ( <i>Salmonella enterica</i> )        | 52               | Q7B6E0           | 14.6             |
| $\alpha$ 3-SiaT, PdST, multifunctional ( <i>Pasteurella dagmatis</i> ) | 80               | C9PR45           | 12.9             |
| $\alpha$ 3-SiaT ( <i>Photobacterium phosphoreum</i> )                  | 80               | A5LHX0           | 13.2             |
| $\alpha$ 6-SiaT, PM0188 ( <i>Pasteurella multocida</i> )               | 80               | Q9CP67           | 14.8             |
| $\alpha$ 6-SiaT ( <i>Photobacterium sp</i> )                           | 80               | A8QYL1           | 11.7             |

Glycosyltransferases are listed that are encoded by the *E. coli* O104 gene cluster (WbwC, WbwA, WbwB), as well as other bacterial mono- and multi-functional sialyltransferases, possibly related to WbwA, from CAZy GT families 42, 52 and 80, as well as a Glc-transferase from the GT52 family. Human sialyl-T synthase (ST3Gal1) is also included. Uniprot alignments were used to determine the percentage of sequence identity with WbwA from *E. coli* O104. The UniProt ID numbers are shown. The identities of these enzymes with WbwA are low. With the exception of putative Gal-transferase WbwB, all of the bacterial enzymes have an HP sequence, and with the exception of Gal-transferase WbwC, all of the bacterial enzymes have at least one (E(D)-E(D)-G motif.



**Supplementary TABLE II.** Inhibition of ST3Gal1 and WbwA activities by bis-imidazolium salts

| <b>Compound</b>                                                              | <b>Number of carbons</b> | <b>Inhibition (%)</b> |                |
|------------------------------------------------------------------------------|--------------------------|-----------------------|----------------|
|                                                                              |                          | <b>WbwA</b>           | <b>ST3Gal1</b> |
| QT147, 1,4-bis(3-methyl-1 <i>H</i> -imidazolium-1-yl)butane dichloride       | 4                        | 10                    | <1             |
| QT141, 1,8-bis(3-methyl-1 <i>H</i> -imidazolium-1-yl)octane dichloride       | 8                        | 12                    | <1             |
| QT142, 1,14-bis(3-methyl-1 <i>H</i> -imidazolium-1-yl)tetradecane dichloride | 14                       | 19                    | <1             |
| QT140, 1,15-bis(3-methyl-1 <i>H</i> -imidazolium-1-yl)pentadecane dichloride | 15                       | 48                    | <1             |
| QT138, 1,16-bis(3-methyl-1 <i>H</i> -imidazolium-1-yl)hexadecane dichloride  | 16                       | 66                    | >90            |
| QT136, 1,18-bis(3-methyl-1 <i>H</i> -imidazolium-1-yl)octadecane dichloride  | 18                       | 64                    | >90            |
| QT135, 1,20-bis(3-methyl-1 <i>H</i> -imidazolium-1-yl)eicosane dichloride    | 20                       | 90                    | 94             |
| QT148, 1,20-bis(3-methyl-1 <i>H</i> -imidazolium-1-yl)eicosane dimesylate    | 20                       | 96                    | >99            |
| QT149, 1,22-bis(3-methyl-1 <i>H</i> -imidazolium-1-yl)docosane dimesylate    | 22                       | 88                    | >99            |

Sialyltransferase assays using purified ST3Gal1 and WbwA in bacterial lysates were performed as described in Material and Methods. Inhibitor concentration in the assays was 0.5 mM. All assays contained 10% MeOH. The concentration of ST3Gal1 acceptor Gal $\beta$ 1-3GalNAc $\alpha$ -Bn was 0.5 mM. For WbwA assays, the concentration of the acceptor Gal $\beta$ 1-3GalNAc $\alpha$ -PO<sub>3</sub>-PO<sub>3</sub>-(CH<sub>2</sub>)<sub>11</sub>-O-phenyl was 0.1 mM. The percentage of inhibition compared to control activity without inhibitor is shown. Number of carbons, the length of the aliphatic carbon chain linking the two imidazolium groups in the chloride or mesylate salts.
